# Supplementary material
Source: publisher figshare collection journal article supplement (https://karger.figshare.com/ndownloader/files/24455306)
Supplement: Supplementary file 1 [file 24455306]

**Supplementary material to:**

**Identification of seasonal variations of antibodies against PR-10 specific epitopes can be improved using peptide-phage display.**

Ramirez-Caballero L., Kny C., Treudler R., Simon J.C., Kern K., Jappe U., Szardenings M.

| <b>Figures and Tables</b>                                                                                                                                         | <b>Page</b> |
|-------------------------------------------------------------------------------------------------------------------------------------------------------------------|-------------|
| Figure E1a. Phage display methods: Generation of peptide phage display data                                                                                       | 2           |
| Figure E1b. Phage display methods: Alignments of enriched sequences observed throughout seasons in a single patient                                               | 3           |
| Figure E2. Location of the PR-10 allergen-related motifs described in Figure 1 within the three-dimensional structure of the major birch pollen allergen Bet v 1. | 4           |
| Figure E3. Reports of birch, alder and hazel pollen exposure in Germany in 2011 and 2013.                                                                         | 5           |
| Table E1. List of motifs with the largest variations of their enrichment values in serum collected over one year.                                                 | 6           |

## Generation of peptide phage display data

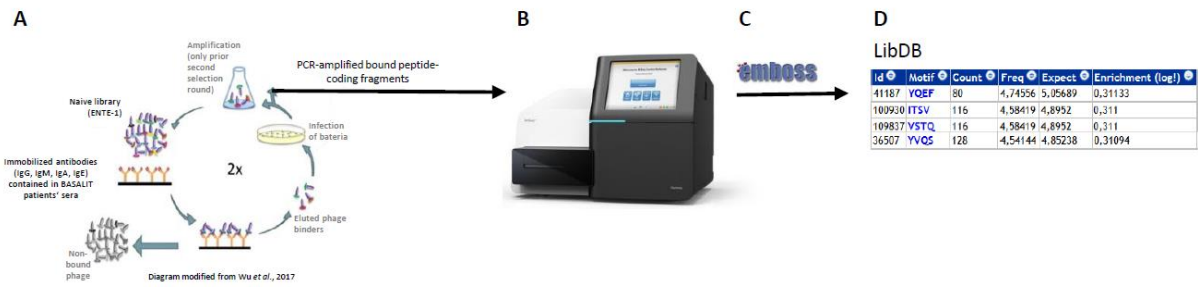

Figure E1a. Peptide phage display data using patients' sera was generated as follows: **A. Phage display experiments:** Sera collected from birch pollen and soya-allergic placebo-treated patients (i.e. five samples  $t_1 - t_5$  from each patient) were used for two consecutive rounds of selection experiments as described by Kern *et al.*, 2019. The starting library has a statistically even distribution with respect to the frequency of individual amino acids. **B. NGS sequencing:** PCR fragments of the peptide-coding genes are sequenced using illumina MiSeq®. **C. Data processing:** Sequences are further processed with tools of the EMBOSS software to remove sequencing errors. **D. Statistics of 4-mer epitope-related motifs in patient-datasets:** Sequencing data are uploaded into a database (LibDB), and further attention is paid to remove remaining detectable sequencing errors. One dataset of 4-mers for each selection round is generated. Their frequency is calculated taking into account the design of the naive library (expected value, [plog]) and the statistical occurrence in the dataset (frequency value, [plog]) resulting in an enrichment value (log). This is compared amongst the different datasets, also using the naïve library as reference. The analysis would not be viable based on trimers or pentamers due to a number of reasons. Motif analysis using trimers would yield in an excessive number of unspecific background sequences containing a given motif. Statistical analysis based on pentamers would need such a large amount of data, that the required number of binding clones is unrealistic. Only enriched epitope-related motifs are considered for further analysis by alignment of the sequences with these motifs (see Figure E1b).



H: Histidine  
 D: Aspartic acid  
 P: Proline  
 Y: Tyrosine  
 S: Serine  
 A: Alanine  
 E: Glutamic acid  
 V: Valine  
 I: Isoleucine  
 G: Glycine  
 T: Threonine  
 N: Asparagine

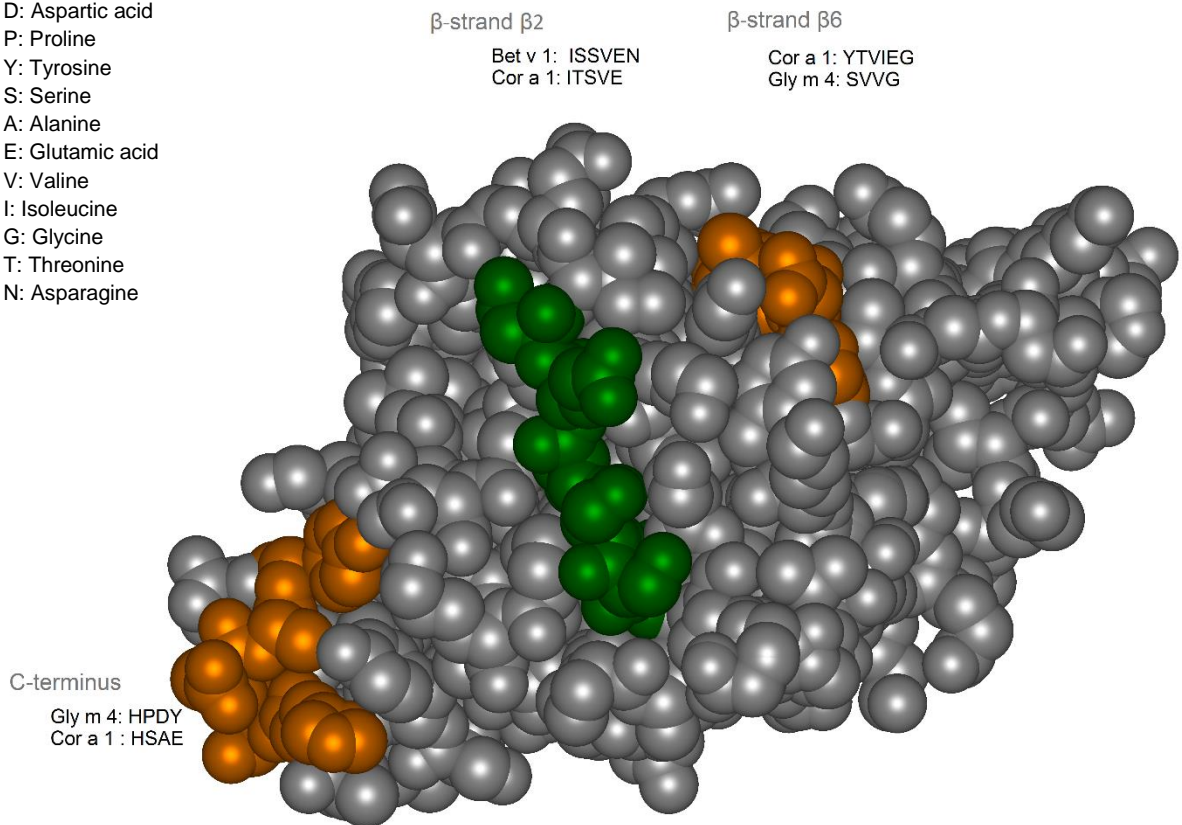

Figure E2. Location of the PR-10 allergen-related motifs described in Figure 1 within the three-dimensional structure of the major birch pollen allergen Bet v 1 (PDB ID:1BV1). Motifs are located at  $\beta$  strand  $\beta$ 2 (green),  $\beta$  strand  $\beta$ 6 (orange, right) and C-terminus (orange, left). Similar motifs from Gly m 4 and Cor a 1 are indicated.

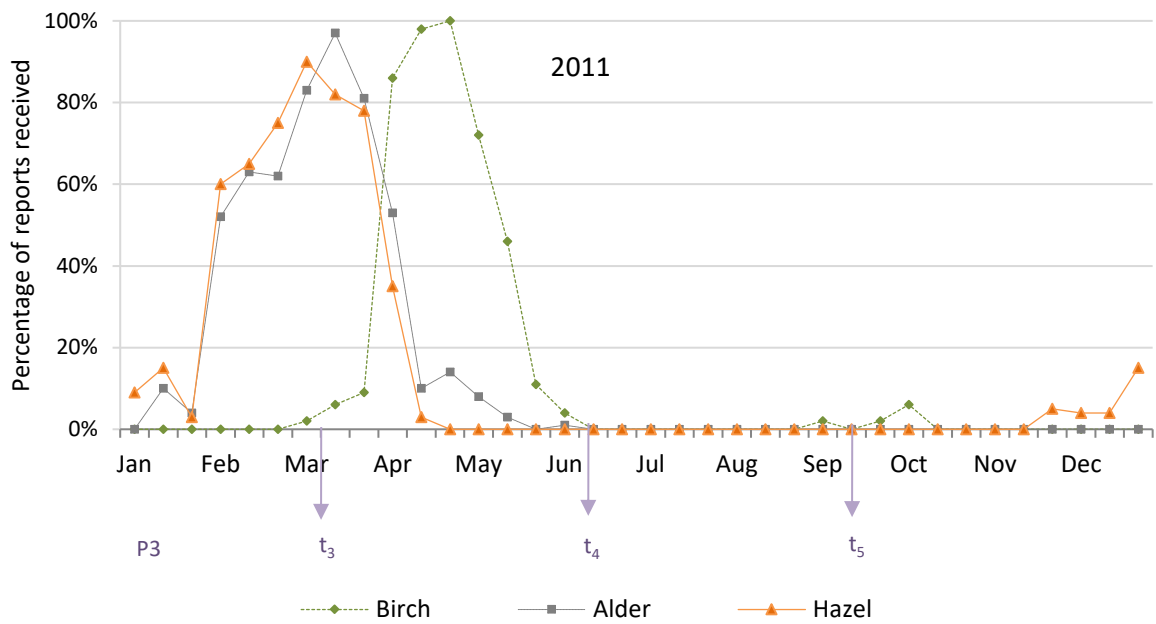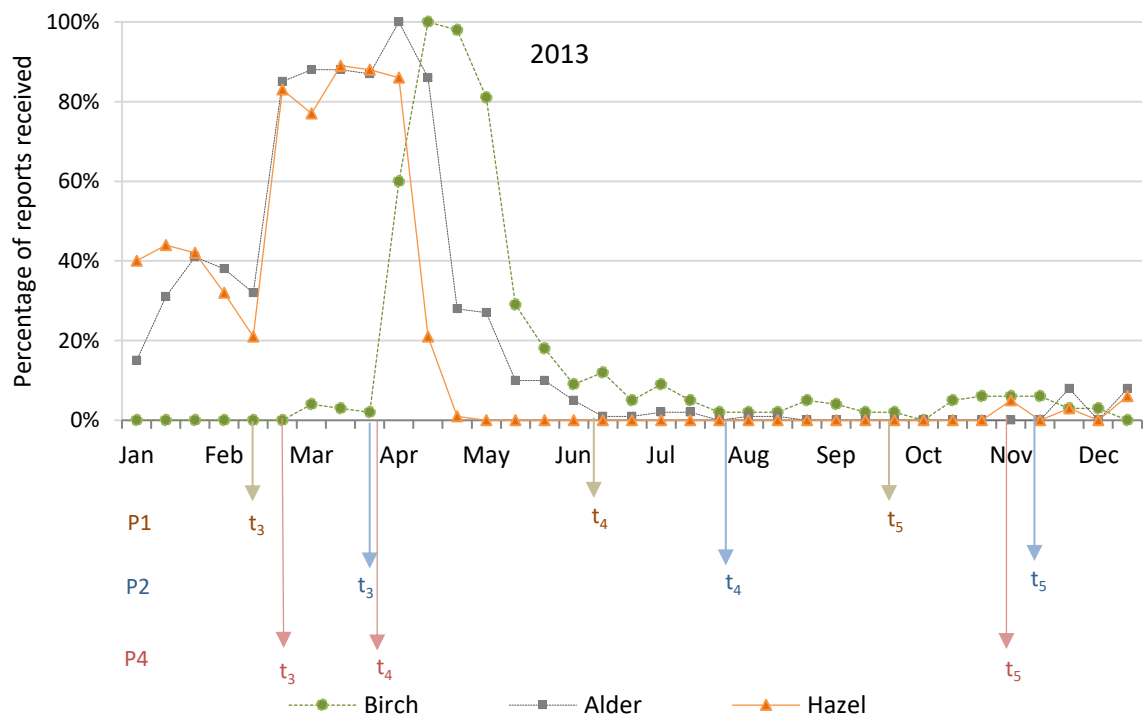

Figure E3. Received reports of birch, alder and hazel pollen exposure in Germany in 2011 (above) and 2013 (below). The gray arrows indicate when serum was collected, labeled by Patient ID and the corresponding time-point ( $t_3 - t_5$ ). The daily average of pollen particles per square meter is calculated based on data from all measurement stations. The average of the measurements taken every ten days is represented along the X-axis. The percentage indicates the received reports in Berlin, Saxony, Saxony Anhalt, and Thuringia, i.e. the region where the patients were studied. Plots were created from records provided by the German Weather Service (*Deutscher Wetterdienst*: <https://www.dwd.de/DE/leistungen/pollen/pollenstatistik.html>).

Table E1. List of motifs with the largest variations of their enrichment values in serum collected over one year. 4-mer motifs identified in patients are indicated, according to their patient ID (P1 – P4) and their amino acid sequence. Motifs that are part of epitopes reported in the Immune Epitope Database are indicated by their identification number. When no epitopes containing the motifs are reported in IEDB, epitope candidates identified in-house from an ongoing larger study (unpublished data) are indicated instead. In this case, the amino acid residues and their position within the allergen are indicated.

| Allergen<br>(GenBank ID)              | Motifs with largest variations in their enrichment values throughout all time-points<br>[Patient ID - 4-mer motifs] | Corresponding epitope<br>(IEDB ID)                                                       |
|---------------------------------------|---------------------------------------------------------------------------------------------------------------------|------------------------------------------------------------------------------------------|
| Bet v 1<br>(Bet v 1.0101<br>CAA33887) | P1 - APQA, PQAI, QAIS; SVEN, VENI, ENIE<br>P4 - VAPQ, APQA                                                          | 35940, 141047, 191291, 191686                                                            |
|                                       | P4 - VDEV, EVDH                                                                                                     | 21651, 181135                                                                            |
|                                       | P2 - RAVE, AVES                                                                                                     | 41567, 58813                                                                             |
| Gly m 4<br>(CAA42646)                 | P2 - VFTF, FTFE, TFED, FEDE, EDEI                                                                                   | Not reported in IEDB<br>(Epitope candidate <sub>2</sub> GVFTFEDEI <sub>10</sub> )        |
|                                       | P2 - KALV, ALVT                                                                                                     | Not reported in IEDB<br>(Epitope candidate <sub>21</sub> KALVTDA <sub>27</sub> )         |
|                                       | P2 - SVEN, VENV, ENVE<br>P1 - VENV, ENVE, NVEG                                                                      | 913573                                                                                   |
|                                       | P3 - ETKF, TKFV, KFVL<br>P4 - LEDG, EDGE, DGET                                                                      | 580931                                                                                   |
|                                       | P3 - SVVG                                                                                                           | 580708, 914272                                                                           |
|                                       | P3 - DAEP, AEPN, EPNQ, PNQD, NQDE                                                                                   | 913251, 913938                                                                           |
|                                       | P3 - LLAH, LAHP, AHPD, HPDY                                                                                         | Not reported in IEDB<br>(Epitope candidate <sub>151</sub> LLAHPDYN <sub>158</sub> )      |
| Cor a 1<br>(Cor a 1.0101<br>CAA50327) | P2 - SVIP, VIPA, IPAA                                                                                               | Not reported in IEDB<br>(Epitope candidate <sub>3</sub> GVFNVEVETPSVIPAA <sub>18</sub> ) |
|                                       | P1 - APQA, PQAI<br>P4 - VAPQ, APQA                                                                                  | 76332, 69411                                                                             |
|                                       | P1 - SVEN, VENV, ENVE                                                                                               | Not reported in IEDB<br>(Epitope candidate <sub>39</sub> TSVENVEG <sub>47</sub> )        |
|                                       | P4 - VDEV, DEVD                                                                                                     | Not reported in IEDB<br>(Epitope candidate <sub>70</sub> ERVDEVND <sub>77</sub> )        |
|                                       | P3 - SVIE, VIEG, IEGD, EGDV, GDVL                                                                                   | Not reported in IEDB<br>(Epitope candidate <sub>84</sub> YTVIEGDVLG <sub>93</sub> )      |
|                                       | P1 - GDHE, DHEI                                                                                                     | Not reported in IEDB<br>(Epitope candidate <sub>124</sub> KGDHEINAEI <sub>133</sub> )    |
